# Supplementary material for: Janus metallic film with gold and silver luster by electroless deposition of silver using poly(dopamine acrylamide) thin film
Source: Royal Society of Chemistry journal article supplement (doi:10.1039/d3ra05099h), 2023-01-01
Supplement: d3ra05099h1.pdf [file d3ra05099h1.pdf]

## supporting information

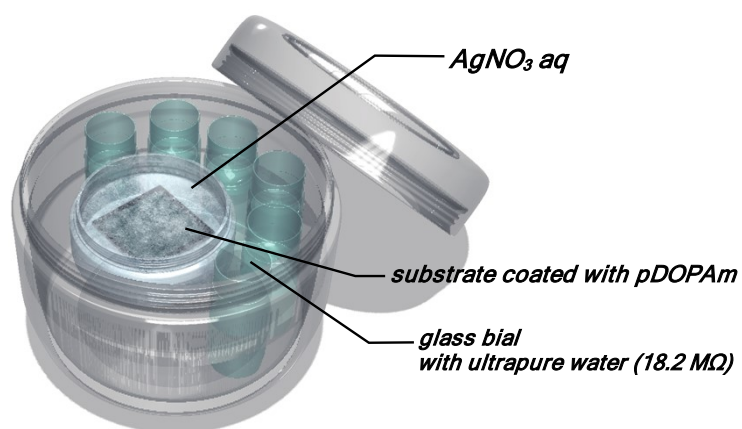

**Figure S1.** Method of thermally annealing in  $\text{AgNO}_3$ .

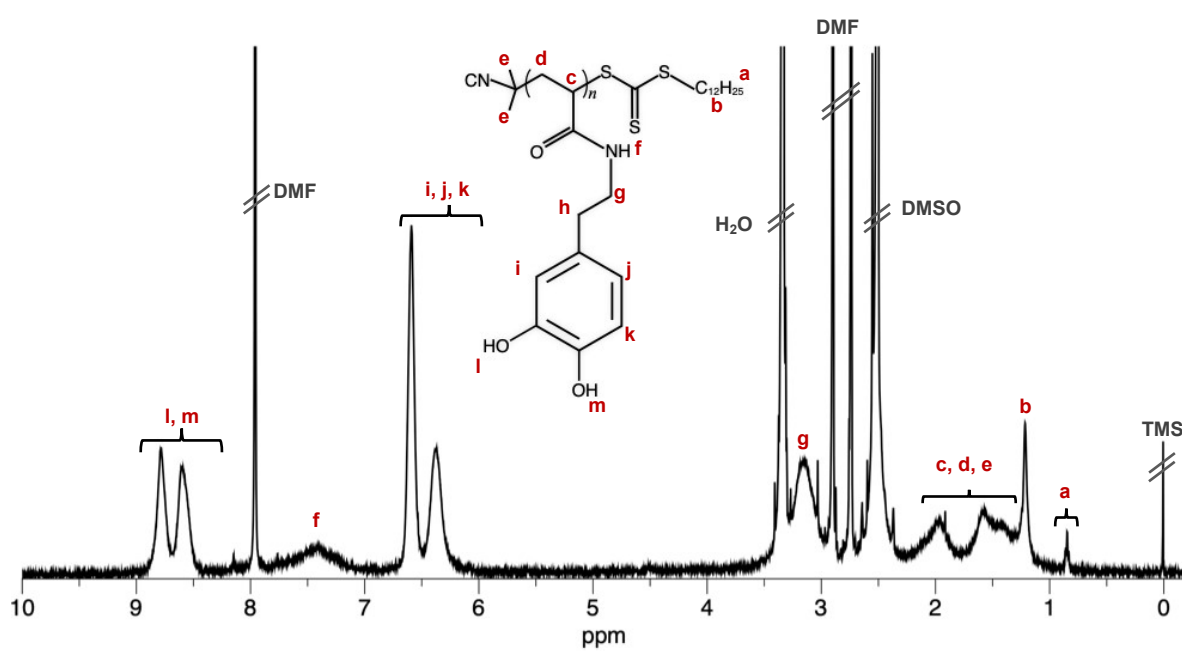

**Figure S2.**  $^1\text{H}$  NMR spectra of pDOPAm in  $\text{DMSO-}d_6$ .

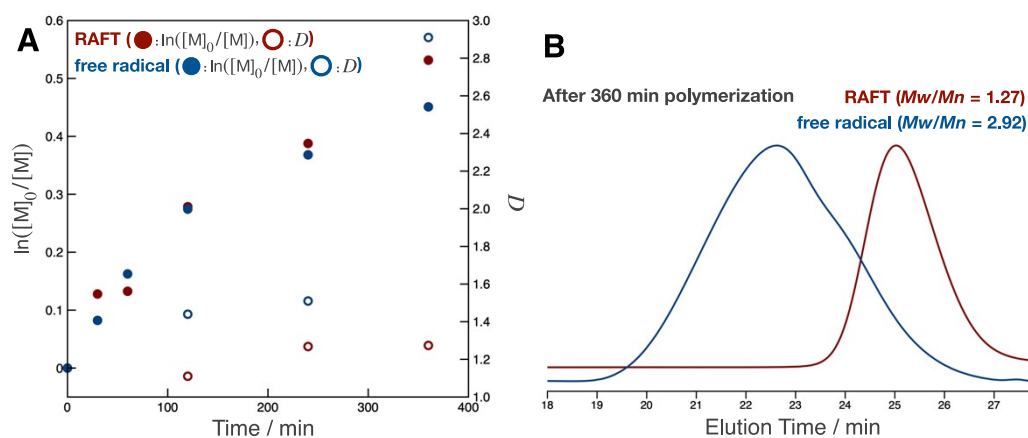

**Figure S3. A:** Conversion and molecular weight dispersity ( $M_w/M_n$ ) of dopamine acrylamide via free radical polymerization and reversible addition-fragmentation chain transfer polymerization vs. polymerization time. **B:** GPC traces of pDOPAm free radical polymerization and RAFT polymerization after 360 min.

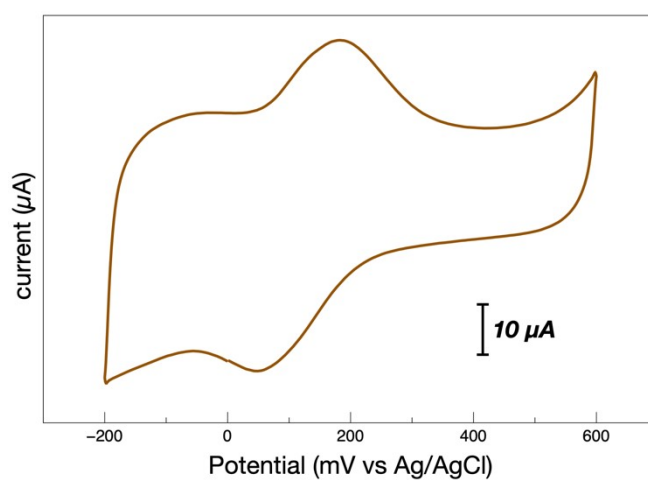

**Figure S4.** The cyclic voltammogram of pDOPAm in 0.1 M phosphate buffer at pH = 8 with a scan rate of 100 mV.

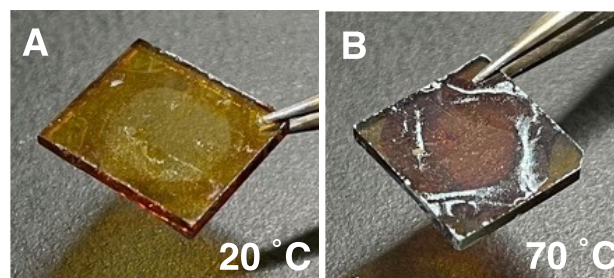

**Figure S5.** Images of pDOPAm thin films after 24 h of electroless deposition of silver at 20 °C (A) and 70 °C (B).

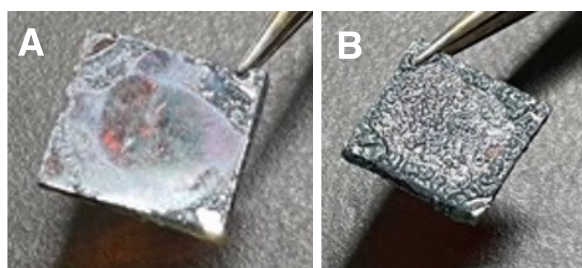

**Figure S6.** Images of pDOPAm thin films after 24 h of electroless deposition of silver. The film thickness 200 nm (A) and 300 nm (B).
